# Supplementary material
Source: Springer Nature journal article supplement (https://www.springermedizin.de/resource/supplementary/12936_2007_435_MOESM1_ESM.pdf/9547444)

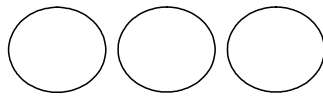

Eggs from stock mosquitoes

**(a)**  
*Larvae*

Low Food

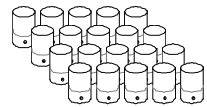

High Food

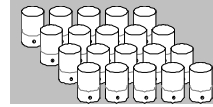

Parental generation

**(b)**  
*Adult*

Mating and egg laying cage

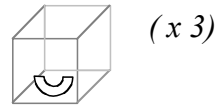

Mating and egg laying cage

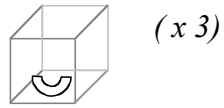

**(c)**  
*Larvae*

Low Food

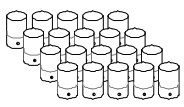

High Food

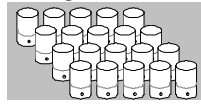

Low Food

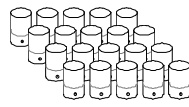

High Food

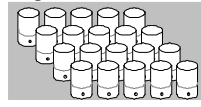

Offspring generation

**(d)**  
*Adult*

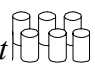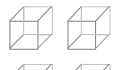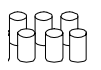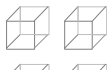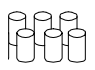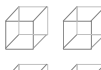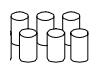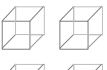

**(e)**  
*Adult*

Blood meal size

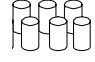

Blood meal size

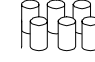

Blood meal size

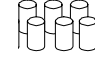

Blood meal size

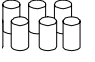

Fecundity

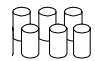

Fecundity

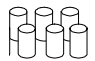

Fecundity

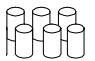

Fecundity

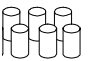

**(f)**

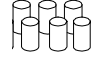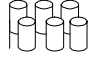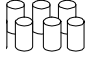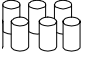

Supplement: MOESM1 [file 9547444]
